# Supplementary material
Source: publisher figshare collection journal article supplement (https://sage.figshare.com/ndownloader/files/18743489)
Supplement: Supplementary file 1 [file 18743489]

# ROYAL FREE HOSPITAL

## CHECKLIST—VASCULAR PATIENT BLOOD MANAGEMENT

### Patient details:

Name.....  
MRN.....  
DOB.....  
Consultant.....

☐ Elective

☐ Emergency

### Preoperative (Tick all that apply)

- ☐ Is the patient anaemic? (Male <130g/l, Female <120g/l):
- ☐ Has anaemia been investigated? (Iron studies/B12/Folate)
- ☐ If Iron deficient, has this been treated? (IV iron Cosmofer 20mg/kg)
- ☐ Is the patient on anticoagulants and has appropriateness been reviewed
- ☐ Is the patient on antiplatelet agents and has appropriateness been reviewed
- ☐ Transfuse one unit if Hb <70g/L, with a Hb target of 70—90g/L after transfusion OR <80g/L in unstable IHD with a Hb target of 80 -100g/L after transfusion.
- ☐ Single Unit Transfusion Policy (recheck Hb after each unit)

HB: 

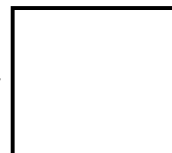

### Intraoperative (Tick all that apply)

- ☐ Tranexamic Acid (1g)
- ☐ Cell salvage
- ☐ Swab Washing
- ☐ Single Unit Transfusion Policy (check Hb after each unit unless active haemorrhage)
- ☐ Point of care testing:
- ☐ ACT
  - ☐ TEG

### Postoperative (Tick all that apply)

- ☐ Restrictive blood samples (no 'routine' samples)
- ☐ Transfuse one unit if Hb <70g/L, with a Hb target of 70—90g/L after transfusion OR <80g/L in unstable IHD with a Hb target of 80 -100g/L after transfusion.
- ☐ Single Unit Transfusion Policy (recheck Hb after each unit)
- ☐ If Iron deficient, has this been treated? (IV iron Cosmofer 20mg/kg)
- ☐ Use of IV iron where appropriate in patients likely to be in hospital > 1 week

**Supplementary File 1:** Protocol devised and approved for use in the vascular speciality at Royal Free Hospital. This includes pre-operative, intra-operative and post-operative guidelines based on PBM concepts from national and NICE guidelines. IHD was defined by the anaesthetist. ACT: activated clotting time; Hb: haemoglobin; IV: intravenous iron; NICE: National Institute for Health and Care Excellence; PBM: Patient blood management; TEG: Thromboelastography.
